# Supplementary material for: Stratification of Breast Cancer by Integrating Gene Expression Data and Clinical Variables
Source: MDPI journal article supplement (doi:10.3390/molecules24030631), 2019-02-11
Supplement: s1 [file s1]

# Supplement File S1. Clustering results based on mRMR and k-means clustering and parameter determination.

In mRMR feature (gene) selection, the number of top relevant genes *pool* and the number of finally selected, simultaneously nonredundant genes *k* for each clinical variable are determined experimentally. We set  $k = [50, 100, 150, 200]$  and  $pool = [1000, 2000, 3000]$  in our experiment and identified the optimal parameter  $k = 100$  and  $pool = 2000$  as the final parameter in our study based on the clustering result. The clustering outcomes under different parameters are given in Table S1, where "Gene number" denotes the number of union candidate genes selected for all clinical variables in our study, and "ARI with PAM50" was calculated by the `adjustedRandIndex()` function in R software to measure the agreement between mRMR subtypes with PAM50. The significant p values of association between subtypes and survival time/ recurrence time were transformed by  $-\log_{10}(-\log_{10}(\text{SUR}) / -\log_{10}(\text{RFS}))$ . The bold content in the table denotes p values that are smaller than 0.05 ( $-\log_{10}(0.05) = 1.30$ ).

We can conclude from the table that when  $pool = 2000$ , all subtypes under distinct *k* are significantly correlated with survival and recurrence; moreover, the agreement with PAM50 achieved best when  $pool = 2000$  and  $k = 100$ . Finally, we chose  $pool = 2000$  and  $k = 100$  as the optimal parameters for further analysis.

**Table S1.** Clustering results based on mRMR and k-means clustering

| mRMR              | k                        | 50          | 100           | 150         | 200         |
|-------------------|--------------------------|-------------|---------------|-------------|-------------|
| <i>pool</i> =1000 | Gene number              | 556         | 1084          | 1589        | 2072        |
|                   | ARI with PAM50           | 0.2741      | 0.3006        | 0.3199      | 0.3333      |
|                   | $-\log_{10}(\text{SUR})$ | <b>9.17</b> | <b>7.77</b>   | <b>7.63</b> | <b>5.37</b> |
|                   | $-\log_{10}(\text{RFS})$ | 1.22        | 1.05          | 1.16        | 0.97        |
| <i>pool</i> =2000 | Gene number              | 552         | 1064          | 1558        | 2038        |
|                   | ARI with PAM50           | 0.2782      | <b>0.3337</b> | 0.3169      | 0.3196      |
|                   | $-\log_{10}(\text{SUR})$ | <b>7.71</b> | <b>5.04</b>   | <b>5.02</b> | <b>5.82</b> |
|                   | $-\log_{10}(\text{RFS})$ | <b>1.55</b> | <b>1.79</b>   | <b>1.87</b> | <b>1.61</b> |
| <i>pool</i> =3000 | Gene number              | 550         | 1061          | 1542        | 2010        |
|                   | ARI with PAM50           | 0.2734      | 0.3248        | 0.3072      | 0.3144      |
|                   | $-\log_{10}(\text{SUR})$ | <b>5.41</b> | <b>5.54</b>   | <b>4.89</b> | <b>3.92</b> |
|                   | $-\log_{10}(\text{RFS})$ | 0.57        | 1.3           | <b>1.67</b> | <b>1.61</b> |
